# Supplementary material for: Introducing the "K-Shaped Sign", A New Finding on CT to Detect Early-Stage Pancreatic Cancer
Source: Preprints.org preprint supplement (doi:10.20944/preprints201912.0250.v1), 2019-12-19
Supplement: Supplementary file 1 [file supplementary]

Archive with 2 entries (2 files):
- COI/Kobashi_coi_disclosure.pdf
- COI/Matsui_coi_disclosure.pdf
